# Supplementary material for: Atrazine transforming polymer prepared by molecular imprinting with post-imprinting process
Source: Royal Society of Chemistry journal article supplement (doi:10.1039/b612407k), 2006-01-01
Supplement: b612407k.pdf [file b612407k.pdf]

## Supplementary Information

### *Atrazine transforming polymer prepared by molecular imprinting with post-imprinting process*

*Takehisa Yane, Hideyuki Shinmori and Toshifumi Takeuchi\**

*Graduate School of Science and Technology, Kobe University, Kobe 657-8501, Japan.*

*Fax/Tel: +81-788036158; E-mail: takeuchi@gold.kobe-u.ac.jp*

#### 1) Michaelis-Menten plot in IP(T1)

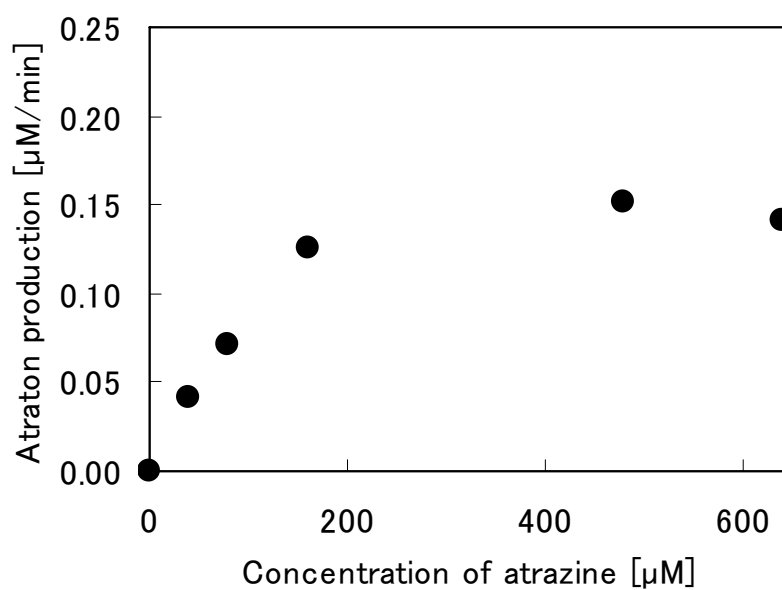

**Fig.S-1** Effect of substrate concentrations on the atraton production in IP(T1).

2) Michaelis-Menten and Lineweaver-Burk plots in IP(T2)

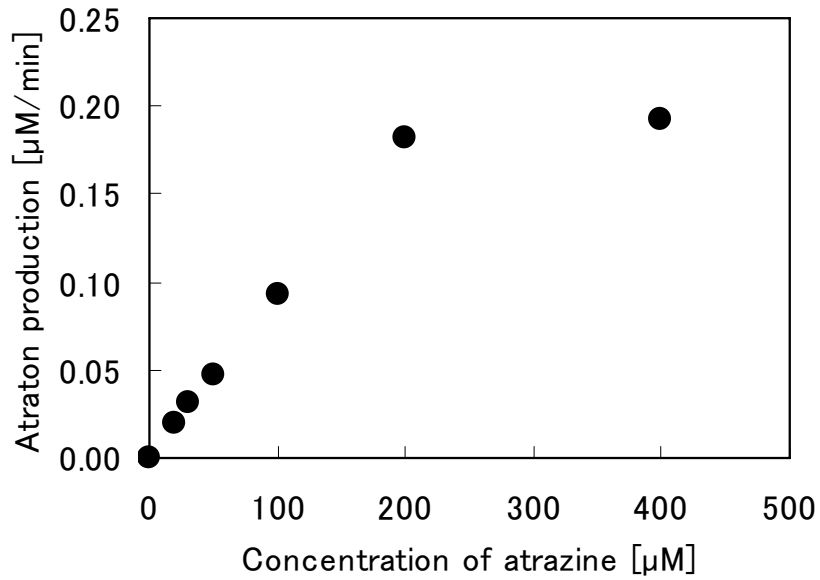

**Fig.S-2** Effect of substrate concentrations on the atraton production in IP(T2).

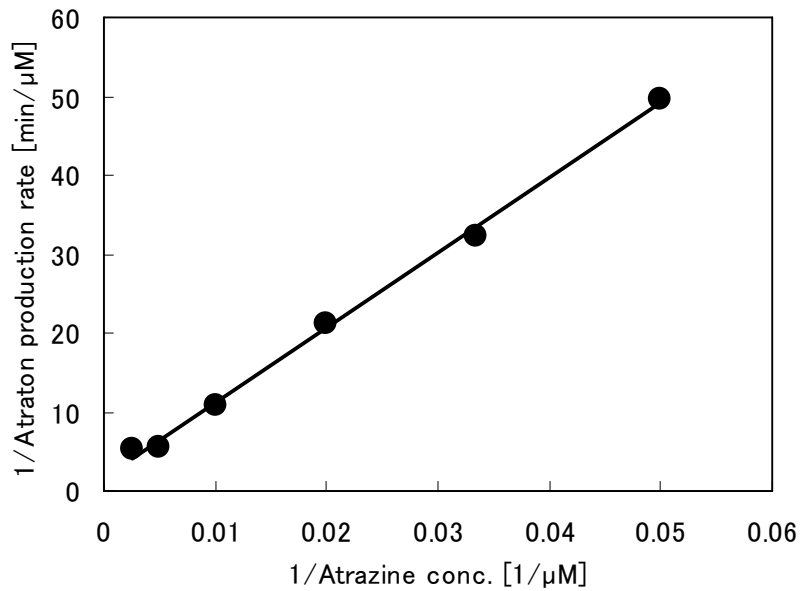

**Fig.S-3** Lineweaver-Burk plot on atraton production catalyzed by IP(T2) at 40 °C;  $V_{\text{max}} = 6.0 \times 10^{-7} \text{ M min}^{-1}$ ,  $K_m = 5.7 \times 10^{-4} \text{ M}$ .
